# Supplementary material for: Chemotherapy-Related Toxic Effects and Quality of Life and Physical Functioning in Older Patients
Source: PubMed Central journal article supplement (PMC10594146; doi:10.1001/jamanetworkopen.2023.39116), 2023-10-23
Supplement: jamanetwopen-e2339116-s002.pdf [file jamanetwopen-e2339116-s002.pdf]

## Data Sharing Statement

Baltussen. Chemotherapy-Related Toxic Effects and Quality of Life and Physical Functioning in Older Patients. *JAMA Netw Open*. Published October 23, 2023.

doi:10.1001/jamanetworkopen.2023.39116

### Data

**Data available:** Yes

**Data types:** Deidentified participant data

**How to access data:** The dataset generated during and/or analysed during the current study are not publicly available due to participant privacy but are available from the corresponding author (J.E.A. Portielje) on reasonable request.

**When available:** With publication

### Supporting Documents

**Document types:** None

### Additional Information

**Who can access the data:** The dataset generated during and/or analysed during the current study are not publicly available due to participant privacy but are available from the corresponding author (J.E.A. Portielje) on reasonable request.

**Types of analyses:** any purpose

**Mechanisms of data availability:** After approval of a proposal by the corresponding author, with investigator support and with a signed data access agreement
